# Supplementary material for: “We’re Not Going to Be as Prepared”: A Qualitative Study of Healthcare Trainees’ Experiences after One Year of the COVID-19 Pandemic
Source: MDPI journal article supplement (doi:10.3390/ijerph20054255), 2023-02-27
Supplement: s1 [file s1]

**Supplementary file S1.** Consolidated criteria for reporting qualitative studies (COREQ): 32-item checklist

| Topic and Item No.                             | Guide Questions/Description                                                                                                                              | Response                                                                                                                                                               |
|------------------------------------------------|----------------------------------------------------------------------------------------------------------------------------------------------------------|------------------------------------------------------------------------------------------------------------------------------------------------------------------------|
| <b>Domain 1: Research team and reflexivity</b> |                                                                                                                                                          |                                                                                                                                                                        |
| <i>Personal Characteristics</i>                |                                                                                                                                                          |                                                                                                                                                                        |
| 1. Interviewer/facilitator                     | Which author/s conducted the interviews?                                                                                                                 | Alex Brewer (AB)                                                                                                                                                       |
| 2. Credentials                                 | What were the researcher's credentials?<br>E.g. PhD, MD                                                                                                  | HB: PhD<br>NC: PhD<br>AB: MSc                                                                                                                                          |
| 3. Occupation                                  | What was their occupation at the time of the study?                                                                                                      | HB: health psychologist/university academic;<br>NC: applied psychologist / health researcher<br>AB: project manager / researcher / MSc student                         |
| 4. Gender                                      | Was the researcher male or female?                                                                                                                       | 2 female, 1 male                                                                                                                                                       |
| 5. Experience and training                     | What experience or training did the researcher have?                                                                                                     | Mixed-methods researchers. Trained in research ethics, research integrity, interview skills.                                                                           |
| <i>Relationship with participants</i>          |                                                                                                                                                          |                                                                                                                                                                        |
| 6. Relationship established                    | Was a relationship established prior to study commencement?                                                                                              | Researchers met the participants during recruitment.                                                                                                                   |
| 7. Participant knowledge of the interviewer    | What did the participants know about the researcher? e.g. personal goals, reasons for doing the research                                                 | Participants knew that AB was a researcher conducting the project as part of his MSc, and that HB and NC were university staff and researchers.                        |
| 8. Interviewer characteristics                 | What characteristics were reported about the interviewer/facilitator? e.g. Bias, assumptions, reasons and interests in the research topic                | Participants knew that the interviewer was interested in the wellbeing of healthcare trainees.                                                                         |
| <b>Domain 2: Study design</b>                  |                                                                                                                                                          |                                                                                                                                                                        |
| <i>Theoretical framework</i>                   |                                                                                                                                                          |                                                                                                                                                                        |
| 9. Methodological orientation and Theory       | What methodological orientation was stated to underpin the study? e.g. grounded theory, discourse analysis, ethnography, phenomenology, content analysis | Deductive and inductive thematic analysis                                                                                                                              |
| <i>Participant selection</i>                   |                                                                                                                                                          |                                                                                                                                                                        |
| 10. Sampling                                   | How were participants selected? e.g. purposive, convenience, consecutive, snowball                                                                       | Convenience sample during a set recruitment period, March-May 2021.                                                                                                    |
| 11. Method of approach                         | How were participants approached? e.g. face-to-face, telephone, mail, email                                                                              | Study promoted via social media (student and healthcare Facebook groups and official Twitter sites), and student-facing mailings, and subsequent contact was by email. |
| 12. Sample size                                | How many participants were in the study?                                                                                                                 | 12 participants took part in individual qualitative interviews                                                                                                         |

|                                        |                                                                                   |                                                                                                                                                               |
|----------------------------------------|-----------------------------------------------------------------------------------|---------------------------------------------------------------------------------------------------------------------------------------------------------------|
| 13. Non-participation                  | How many people refused to participate or dropped out? Reasons?                   | No participants actively refused to participate or withdrew following consent.                                                                                |
| <i>Setting</i>                         |                                                                                   |                                                                                                                                                               |
| 14. Setting of data collection         | Where was the data collected? e.g. home, clinic, workplace                        | Data were collected online (video-conferencing platform)                                                                                                      |
| 15. Presence of non-participants       | Was anyone else present besides the participants and researchers?                 | Interviews: No.                                                                                                                                               |
| 16. Description of sample              | What are the important characteristics of the sample? e.g. demographic data, date | Age, gender, subject discipline, year of study, work-related covid-19 exposure during the pandemic (in health or social care environments)                    |
| <i>Data collection</i>                 |                                                                                   |                                                                                                                                                               |
| 17. Interview guide                    | Were questions, prompts, guides provided by the authors? Was it pilot tested?     | Question guide was developed by the project team and discussed with a healthcare trainee who was not a participant in the study.                              |
| 18. Repeat interviews                  | Were repeat interviews carried out? If yes, how many?                             | No repeat interviews.                                                                                                                                         |
| 19. Audio/visual recording             | Did the research use audio or visual recording to collect the data?               | Interviews were audio-recorded.                                                                                                                               |
| 20. Field notes                        | Were field notes made during and/or after the interview?                          | No.                                                                                                                                                           |
| 21. Duration                           | What was the duration of the interviews or focus group?                           | Interviews lasted between 20 and 37 minutes, with an average time of 33 minutes.                                                                              |
| 22. Data saturation                    | Was data saturation discussed?                                                    | Recruitment continued until the dataset was deemed to hold sufficient information power.                                                                      |
| 23. Transcripts returned               | Were transcripts returned to participants for comment and/or correction?          | No, due to time constraints.                                                                                                                                  |
| <b>Domain 3: analysis and findings</b> |                                                                                   |                                                                                                                                                               |
| <i>Data analysis</i>                   |                                                                                   |                                                                                                                                                               |
| 24. Number of data coders              | How many data coders coded the data?                                              | One coded the data, a second researcher checked the codes.                                                                                                    |
| 25. Description of the coding tree     | Did authors provide a description of the coding tree?                             | No, however initial coding was informed by the interview guide, and coding was continuously refined.                                                          |
| 26. Derivation of themes               | Were themes identified in advance or derived from the data?                       | Initial coding framework was derived based on a prior study, which was refined based on the data and generated codes (combined deductive-inductive approach). |
| 27. Software                           | What software, if applicable, was used to manage the data?                        | None.                                                                                                                                                         |
| 28. Participant checking               | Did participants provide feedback on the findings?                                | No, due to time constraints.                                                                                                                                  |
| <i>Reporting</i>                       |                                                                                   |                                                                                                                                                               |
| 29. Quotations presented               | Were participant quotations presented to illustrate the themes or findings?       | Yes, quotes included and identified with participant ID.                                                                                                      |

|                                  |                                                                        |      |
|----------------------------------|------------------------------------------------------------------------|------|
|                                  | Was each quotation identified? e.g., participant number                |      |
| 30. Data and findings consistent | Was there consistency between the data presented and the findings?     | Yes. |
| 31. Clarity of major themes      | Were major themes clearly presented in the findings?                   | Yes. |
| 32. Clarity of minor themes      | Is there a description of diverse cases or discussion of minor themes? | Yes. |
