# Supplementary material for: “We’re Not Going to Be as Prepared”: A Qualitative Study of Healthcare Trainees’ Experiences after One Year of the COVID-19 Pandemic
Source: MDPI journal article supplement (doi:10.3390/ijerph20054255), 2023-02-27
Supplement: s1 [file s1]

**Supplementary file S3.** Conceptual model for mitigating the impacts of COVID-19 on health and care workers (as seen in Blake et al, 2021)

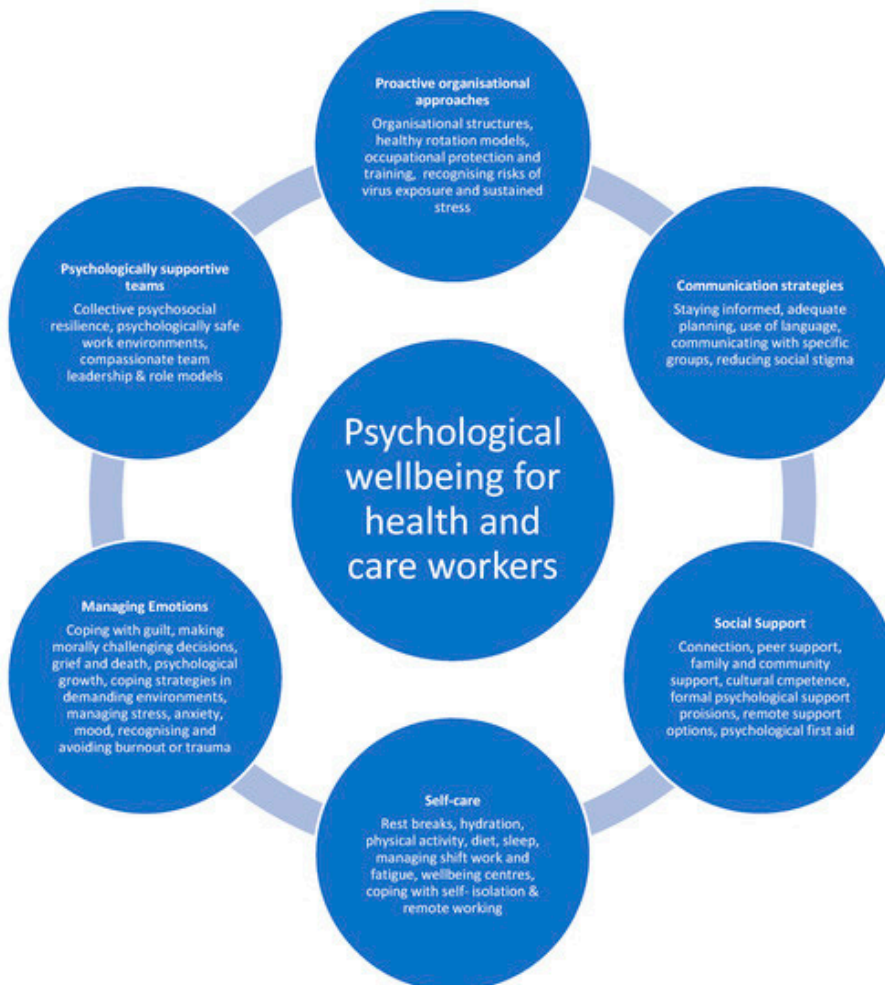

Source:

Blake, H.; Mahmood, I.; Dushi, G.; Yildirim, M.; Gay, E. Psychological Impacts of COVID-19 on Healthcare Trainees and Perceptions towards a Digital Wellbeing Support Package. *Int. J. Environ. Res. Public Health* 2021, 18, 10647. <https://doi.org/10.3390/ijerph182010647>
